# Supplementary material
Source: PubMed Central journal article supplement (PMC4198495)

## Supplemental Fig. 1a Full-length primers

### Full-length sequencing with Roche/454 FLX+

| Primer Name         | Location | Size <sup>a</sup> | Sequence                                         |
|---------------------|----------|-------------------|--------------------------------------------------|
| DRA_5UTR_MIDxx      | 5' UTR   | 804 bp            | 5' - [Adapter_A] [MID] CCGAGCTCTACTGACTCCCAA     |
| DRA_3UTR_MIDxx      | 3' UTR   |                   | 5' - [Adapter_B] [MID] AAGAAACACCATCACCTGCAT     |
| DRB_TiAmp1_MIDxx_F  | 5' UTR   | 853 bp            | 5' - [Adapter_A] [MID] CTGGTCCTGTCCTGTTCTCC      |
| DRB_TiAmp2_MIDxx_R  | 3' UTR   |                   | 5' - [Adapter_B] [MID] AAAGCTGGGGCAGAAGGTT       |
| DQA_5UTR_MIDxx      | 5' UTR   | 829 bp            | 5' - [Adapter_A] [MID] GAGGCTGCCTTGGGAAGA        |
| DQA_3UTR_MIDxx      | 3' UTR   |                   | 5' - [Adapter_B] [MID] SCTARGTCATGTAGCAAGTCCA    |
| DQB_5UTR_Badp_MIDxx | 5' UTR   | 794 bp            | 5' - [Adapter_B] [MID] CCACTACTTTTCCCTTCGTCT     |
| DQBnew_3UTR_MIDxx   | 3' UTR   |                   | 5' - [Adapter_A] [MID] CCAGTTAAAATAGTCTCAGGAGTCA |
| DPA_5UTR_MIDxx      | 5' UTR   | 815 bp            | 5' - [Adapter_B] [MID] CATCAATTAKAGACCCYAYAAC    |
| DPA_3UTR_MIDxx      | 3' UTR   |                   | 5' - [Adapter_A] [MID] TCCTAAGTCCTCTTCTGTTCAG    |
| DPB_5UTR_MIDxx      | 5' UTR   | 855 bp            | 5' - [Adapter_A] [MID] GCAGCTCTTTTCATTTGCCATCC   |
| DPB_3UTR_MIDxx      | 3' UTR   |                   | 5' - [Adapter_B] [MID] GTCCTGGAACCAAGGTGCTAACG   |

Adapter\_A - 25 bp 5' - CGTATCGCCTCCCTCGCGCCATCAG

Adapter\_B - 25 bp 5' - CTATGCGCCTTGCCAGCCCGCTCAG

MIDs - 10 bp 10bp sequences available from Roche/454

<sup>a</sup> size of product of interest, once all primers have been trimmed

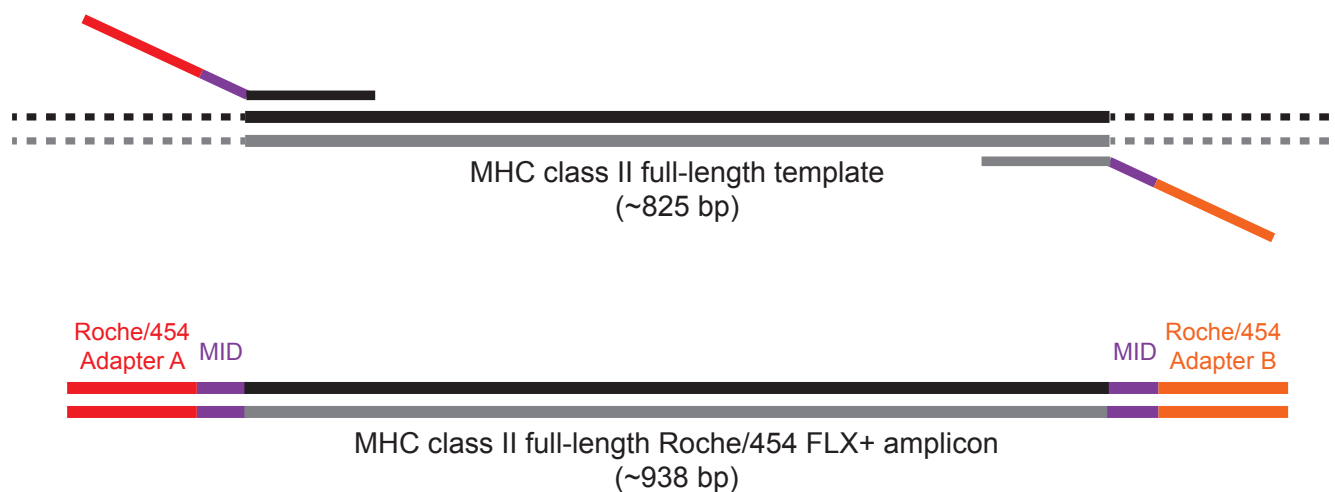

Supplement: NIHMS621707-supplement-251_2014_797_MOESM1_ESM.pdf [file NIHMS621707-supplement-251_2014_797_MOESM1_ESM.pdf]
