# Supplementary material
Source: PubMed Central journal article supplement (PMC4198495)

## Supplemental Fig. 1b Exon 2 primers

### Exon 2 sequencing with Fluidigm + Illumina MiSeq

#### Inner Primers:

| Primer Name                | Location | Size <sup>a</sup> | Sequence <sup>b</sup>            |
|----------------------------|----------|-------------------|----------------------------------|
| CS1-DRB283g_F <sup>c</sup> | exon 2   | 247 bp            | 5' - [CS1] tccccacagCACGTTTCTT   |
| CS2-DRB283g_R              | exon 2   |                   | 5' - [CS2] cCTCGCCGCTGCACTGT     |
| CS1-DRB283g_F <sup>c</sup> | exon 2   | 247 bp            | 5' - [CS2] tccccacagCACGTTTCTT   |
| CS1-DRB283g_R              | exon 2   |                   | 5' - [CS1] cCTCGCCGCTGCACTGT     |
| CS2-DQA243g_F              | exon 2   | 204 bp            | 5' - [CS2] GTTGCCTCTTRCGGTGTAAA  |
| CS1-DQA243g_R              | exon 2   |                   | 5' - [CS1] acCATTGGTAGCAGCGGTR   |
| CS2-DQB192g_F              | exon 2   | 154 bp            | 5' - [CS2] cccgcagAGGATTTTCGTG   |
| CS1-DQB192g_R              | exon 2   |                   | 5' - [CS1] GTCCTTCTGGCTGTTCCAGT  |
| CS2-DPA212g_F              | exon 2   | 173 bp            | 5' - [CS2] CACATAGACCAACAGGGGAGT |
| CS1-DPA212g_R              | exon 2   |                   | 5' - [CS1] acCATTGGCGGCKGAGT     |
| CS2-DPB228g_F              | exon 2   | 192 bp            | 5' - [CS2] GCGTTTAAAYGGACACAGC   |
| CS1-DPB272g_R              | exon 2   |                   | 5' - [CS1] TCGGCGCTKCAGGGTCA     |

CS1 - 22 bp 5' - ACACTGACGACATGGTTCTACA  
 CS2 - 22 bp 5' - TACGGTAGCAGAGACTTGGTCT

#### Outer Primers:

| Primer Name | Location | Sequence                       |
|-------------|----------|--------------------------------|
| PE1-CS1     | -        | 47 bp 5' - [PE1] [CS1]         |
| PE2-BC-CS2  | -        | 56 bp 5' - [PE2] [index] [CS2] |

PE1 - 25 bp 5' - AATGATACGGCGACCACCGAGATCT  
 PE2 - 24 bp 5' - CAAGCAGAAGACGGCATAACGAGAT

indexes (IDX) - 10 bp 10bp sequences available from Fluidigm pre-integrated with PE2 and CS2 linkers

<sup>a</sup> size of product of interest, once all primers have been trimmed

<sup>b</sup> lower-case letters in primer sequences indicate portions of the primer corresponding to intronic sequence

<sup>c</sup> two sets of DRB primers, differing only in which CS sequence is used for the forward/reverse primers, were used to increase sequencing pool diversity to improve overall sequencing results

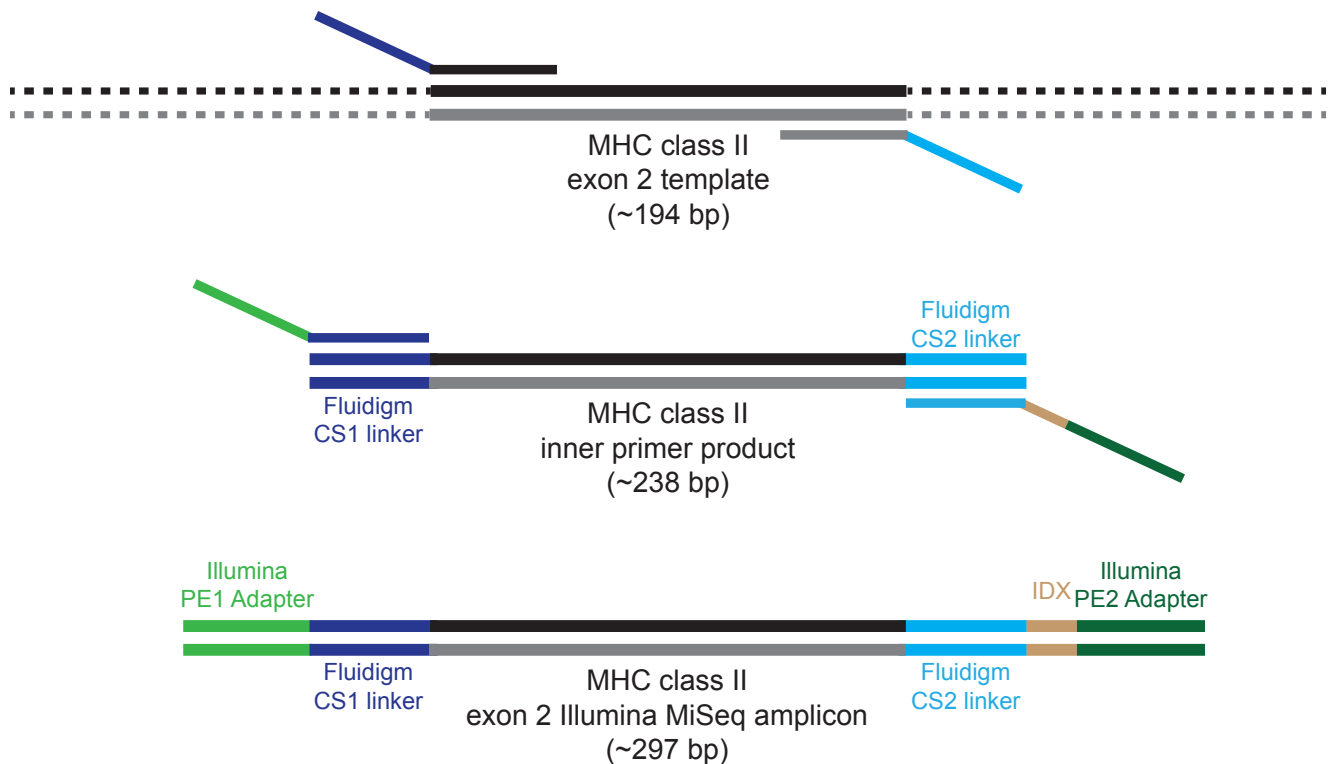

Supplement: NIHMS621707-supplement-251_2014_797_MOESM2_ESM.pdf [file NIHMS621707-supplement-251_2014_797_MOESM2_ESM.pdf]
