# Supplementary material
Source: PubMed Central journal article supplement (PMC4198495)
Supplement: NIHMS621707-supplement-251_2014_797_MOESM5_ESM.pdf [file NIHMS621707-supplement-251_2014_797_MOESM5_ESM.pdf]

**Supplemental Table 1:** Sequences too short for GenBank submission

| Allele Name           | Length | Reference Animal(s) | Sequence                                                                                                                                                                                                |
|-----------------------|--------|---------------------|---------------------------------------------------------------------------------------------------------------------------------------------------------------------------------------------------------|
| <i>DPA1*07:nov:06</i> | 173 bp | 072, 092, 096       | ATATGTTTGAGTTTGATGAGGATGAGATGTTCTATGTGGATCTGGACAAGAAGGAGACCTTTTG<br>GCATCTGGAGGAGTTTGGCCGAGCCCTTTTCCTTGACGCTCAGGGAGGGCTGGCTAACATTGCT<br>GCACTGAACCACAACCTTGAATATCATAATCCAGCGCTCCAACCAC                  |
| <i>DPB1*19:nov:01</i> | 189 bp | 094, 104            | GCTTCCTGGACAGATTCATCTACAACCAGGAGGAGTACGTGCGCTTCGACAGCGACCTGGGGGA<br>GTTCCGGGCAGTGACGGAGCTGGGACGGCCTACTGCCGAGTACTGGAACAGACAGGACTCCCTG<br>GAGCAGGAGCGGGCCGAGGTGGACAGGGTGTGCAGACATAACTACGAGCTGGATGAGGCCG   |
| <i>DPB1*19:nov:02</i> | 189 bp | 076, 102            | GCTTCCTGGACAGATTCATCTACAACCAGGAGGAGTTCGTGCGCTTCGACAGCGACCTGGGGGA<br>GTTCCGGGCAGTGACGGAGCTGGGACGGCCTACTGCCGAGTACTGGAACAGACAGGACTCCCTG<br>GAGCAGGAGCGGGCCGAGGTGGACAGGGTGTGCAGACATAACTACGAGCTGGATGAGGCCG   |
| <i>DPB1*21:nov:01</i> | 189 bp | 061                 | GCCTCCTGGACAGATCCATCTACAACCAGGAGGAGTTCGTGCGCTTCGACAGCGACCTGGGGGA<br>GTACCGGGCAGTGACGGAGCTGGGACGGCCTGCTGCTGAGCGCTGGAACAGACAGGACAACCTG<br>GAGCAGGAGCGGGCTGAGGTGGACAGGGTGTGCAGATACAATACTACGAGCTGGATGAGGCCG |
